# Supplementary material for: Ovine ENSOARG00020011332 rs427117280-GG provides an increase in weaning weight and average daily gain until weaning weight in a multi-breed sheep population
Source: Copernicus journal article supplement (doi:10.5194/aab-68-357-2025), 2025-05-28
Supplement: Supplementary file [file aab-68-357-2025-supplement.pdf]

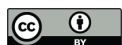

## *Supplement of*

# **Ovine *ENSOARG00020011332* rs427117280-GG provides an increase in weaning weight and average daily gain until weaning weight in a multi-breed sheep population**

**Bilal Akyüz et al.**

*Correspondence to:* Mehmet Ulaş Çınar ([mucinar@erciyes.edu.tr](mailto:mucinar@erciyes.edu.tr))

The copyright of individual parts of the supplement might differ from the article licence.

**Table S1. Association of *ENSOARG00020011332 rs427117280* with growth traits weights showing adjusted means and standard errors from Akkaraman sheep population.**

| SNP                       | Genotypes      | Birth Weight  | BW30             | BW60             | BW90            | ADGB-90    |
|---------------------------|----------------|---------------|------------------|------------------|-----------------|------------|
| <b><i>rs427117280</i></b> | GG             | 3,781.02±26.0 | 14,077.40 ±603.0 | 18,703.05 ±331.0 | 30,899.77±346.0 | 301.43±4.8 |
|                           | TG             | 3,839.73±12.0 | 13,441.94 ±127.0 | 18,816.73 ±150.0 | 30150.82±193.0  | 292.68±2.1 |
|                           | TT             | 3,792.80±26.0 | 13,473.17 ±396.0 | 17,508.00±336.0  | 30914.57±363.0  | 301.73±4.8 |
|                           | Birth type     | ***           | ***              | **               | **              | ***        |
|                           | Farm           | NA            | NA               | NA               | NA              | NA         |
|                           | Sex            | NS            | ***              | ***              | ***             | ***        |
|                           | Ewe age        | *             | *                | NS               | NS              | NS         |
|                           | R <sup>2</sup> | 0.31          | 0.10             | 0.11             | 0.15            | 0.15       |
|                           | P-value        | 0.20          | 0.58             | 0.55             | 0.46            | 0.41       |

*BW: Body weight; ADGB-90: Average daily weight gain until 90<sup>th</sup> day; Bold lettering highlights when genotypes were significantly associated with traits of interest ( $P \leq 0.01$ ); \*\*\* ( $P \leq 0.001$ ); \*\* ( $P \leq 0.01$ ); \* ( $P \leq 0.05$ ); NS: not significant; NA: not applicable.*

**Table S2. Association of *ENSOARG00020011332 rs427117280* with growth traits showing adjusted means and standard errors from Şavak Akkaraman sheep population.**

| SNP                | Genotypes      | Birth Weight  | BW30           | BW60             | BW90             | ADGB-90          |
|--------------------|----------------|---------------|----------------|------------------|------------------|------------------|
| <i>rs427117280</i> | GG             | 38,56.27±23.0 | 8,298.85±228.0 | 14,609.87 ±278.0 | 20,676.71 ±346.0 | 186.89±3.8       |
|                    | TG             | 39,08.24±12.0 | 7,359.94±151.0 | 13,506.83 ±155.0 | 17,417.55 ±193.0 | 150.10±2.1       |
|                    | TT             | 38,59.59±24.0 | 7,534.90±359.0 | 12,832.35 ±292.0 | 16,735.74 ±363.0 | 143.06±4.01      |
|                    | Birth type     | ***           | NS             | NS               | NS               | NS               |
|                    | Farm           | ***           | ***            | *                | **               | ***              |
|                    | Sex            | ***           | NS             | NS               | NS               | *                |
|                    | Ewe age        | NS            | NS             | NS               | NS               | NS               |
|                    | R <sup>2</sup> | 0.35          | 0.10           | 0.038            | 0.13             | 0.14             |
|                    | P-value        | 0.56          | <b>0.0006</b>  | <b>0.004</b>     | <b>2.037e-10</b> | <b>1.051e-10</b> |

*BW: Body weight; ADGB-90: Average daily weight gain until 90<sup>th</sup> day; Bold lettering highlights when genotypes were significantly associated with traits of interest ( $P \leq 0.01$ ); \*\*\* ( $P \leq 0.001$ ); \*\* ( $P \leq 0.01$ ); \* ( $P \leq 0.05$ ); NS: not significant; NA: not applicable.*

**Table S3. Association of *ENSOARG00020011332 rs427117280* with growth traits showing adjusted means and standard errors from Karayaka sheep population.**

| SNP                | Genotypes      | Birth Weight  | BW30             | BW60             | BW90             | ADGB-90     |
|--------------------|----------------|---------------|------------------|------------------|------------------|-------------|
| <i>rs427117280</i> | GG             | 3,713.85±23.0 | 13,215.29 ±228.0 | 20,201.12 ±278.0 | 28,284.26 ±346.0 | 273.00±3.8  |
|                    | TG             | 3,694.44±12.0 | 12,078.55 ±151.0 | 18,596.30 ±155.0 | 26,577.30 ±193.0 | 254.25±2.1  |
|                    | TT             | 3,675.70±24.0 | 12,005.54 ±359.0 | 18,982.69 ±292.0 | 26,569.86 ±363.0 | 254.37±4.01 |
|                    | Birth type     | <b>**</b>     | NS               | NS               | NS               | NS          |
|                    | Farm           | <b>***</b>    | NS               | <b>***</b>       | <b>***</b>       | <b>***</b>  |
|                    | Sex            | <b>*</b>      | NS               | <b>*</b>         | <b>***</b>       | <b>***</b>  |
|                    | Ewe age        | <b>***</b>    | NS               | NS               | NS               | NS          |
|                    | R <sup>2</sup> | 0.58          | 0.005            | 0.10             | 0.19             | 0.17        |
|                    | P-value        | 0.82          | 0.25             | 0.26             | 0.30             | 0.30        |

*BW: Body weight; ADGB-90: Average daily weight gain until 90<sup>th</sup> day; Bold lettering highlights when genotypes were significantly associated with traits of interest ( $P \leq 0.01$ ); \*\*\* ( $P \leq 0.001$ ); \*\* ( $P \leq 0.01$ ); \* ( $P \leq 0.05$ ); NS: not significant; NA: not applicable.*

**Table S4. Association of *ENSOARG00020011332 rs427117280* with growth traits showing adjusted means and standard errors from Morkaraman sheep population.**

| SNP                | Genotypes      | Birth Weight  | BW30           | BW60             | BW90             | ADGB-90     |
|--------------------|----------------|---------------|----------------|------------------|------------------|-------------|
| <i>rs427117280</i> | GG             | 3,781.64±23.0 | 9,154.80±228.0 | 15,487.23 ±278.0 | 28,284.26 ±346.0 | 208.77±3.8  |
|                    | TG             | 3,796.89±12.0 | 9,651.66±151.0 | 16,386.82 ±155.0 | 26,577.30 ±193.0 | 223.11±2.1  |
|                    | TT             | 3,760.58±24.0 | 9,301.72±359.0 | 15,744.15 ±292.0 | 26,569.86 ±363.0 | 218.84±4.01 |
|                    | Birth type     | ***           | ***            | ***              | ***              | ***         |
|                    | Farm           | NS            | NS             | NS               | NS               | NS          |
|                    | Sex            | NS            | NS             | NS               | NS               | NS          |
|                    | Ewe age        | NS            | NS             | **               | **               | ***         |
|                    | R <sup>2</sup> | 0.29          | 0.13           | 0.16             | 0.14             | 0.12        |
|                    | P-value        | 0.79          | 0.30           | 0.15             | 0.12             | 0.21        |

*BW: Body weight; ADGB-90: Average daily weight gain until 90<sup>th</sup> day; Bold lettering highlights when genotypes were significantly associated with traits of interest ( $P \leq 0.01$ ); \*\*\* ( $P \leq 0.001$ ); \*\* ( $P \leq 0.01$ ); \* ( $P \leq 0.05$ ); NS: not significant; NA: not applicable.*

**Table S5. Association of *ENSOARG00020011332 rs427117280* with growth traits showing adjusted means and standard errors from İvesi sheep population.**

| SNP                | Genotypes      | Birth Weight  | BW30             | BW60             | BW90             | ADGB-90     |
|--------------------|----------------|---------------|------------------|------------------|------------------|-------------|
| <i>rs427117280</i> | GG             | 3,685.50±23.0 | 14,918.22 ±228.0 | 20,298.50 ±278.0 | 28,639.98 ±346.0 | 277.27±3.8  |
|                    | TG             | 3,748.50±12.0 | 14,928.72 ±151.0 | 20,475.58 ±155.0 | 28,373.22 ±193.0 | 273.60±2.1  |
|                    | TT             | 3,611.79±24.0 | 14,928.72 ±359.0 | 20,381.72 ±292.0 | 27,110.45 ±363.0 | 261.09±4.01 |
|                    | Birth type     | ***           | **               | **               | **               | *           |
|                    | Farm           | ***           | ***              | ***              | ***              | ***         |
|                    | Sex            | ***           | ***              | ***              | ***              | ***         |
|                    | Ewe age        | NS            | ***              | ***              | ***              | ***         |
|                    | R <sup>2</sup> | 0.45          | 0.49             | 0.48             | 0.52             | 0.52        |
|                    | P-value        | 0.18          | 0.99             | 0.94             | 0.34             | 0.39        |

*BW: Body weight; ADGB-90: Average daily weight gain until 90<sup>th</sup> day; Bold lettering highlights when genotypes were significantly associated with traits of interest ( $P \leq 0.01$ ); \*\*\* ( $P \leq 0.001$ ); \*\* ( $P \leq 0.01$ ); \* ( $P \leq 0.05$ ); NS: not significant; NA: not applicable.*
